# Supplementary figures and images for: OneStopRNAseq: A Web Application for Comprehensive and Efficient Analyses of RNA-Seq Data
Source: MDPI journal article supplement (doi:10.3390/genes11101165), 2020-10-02

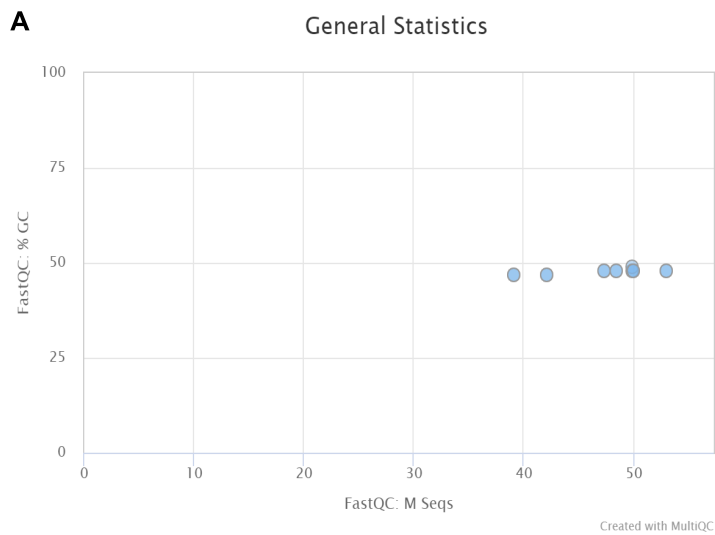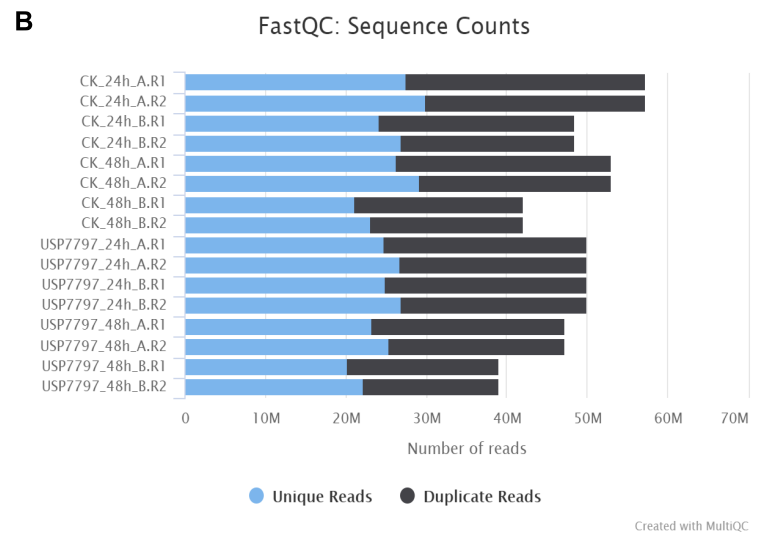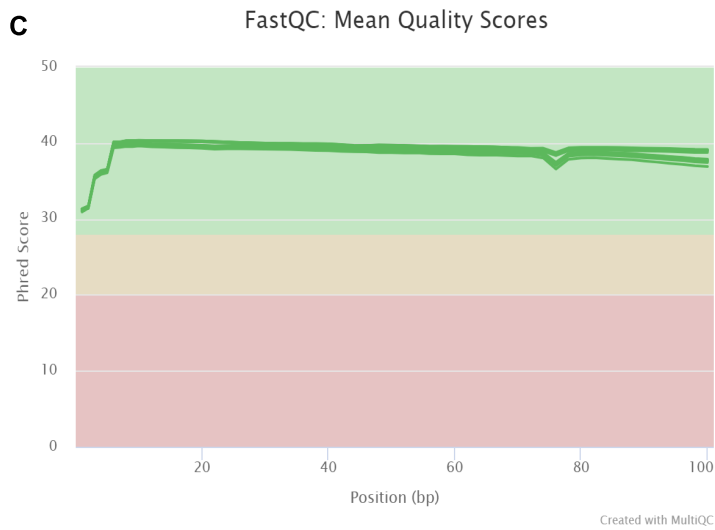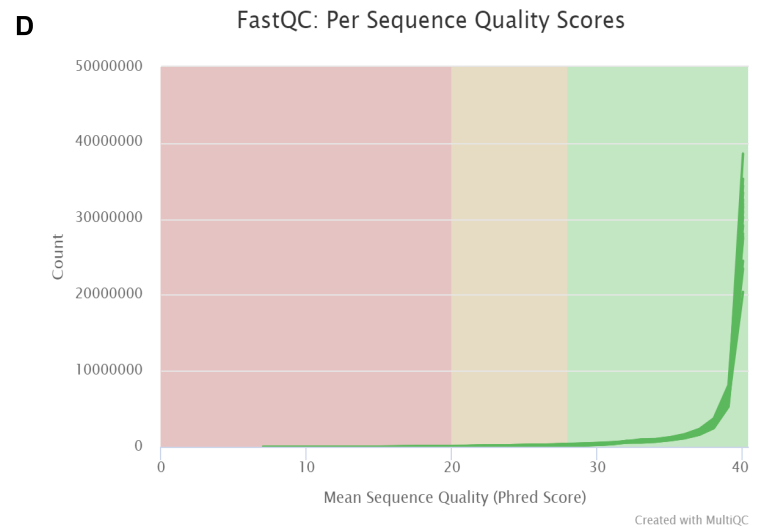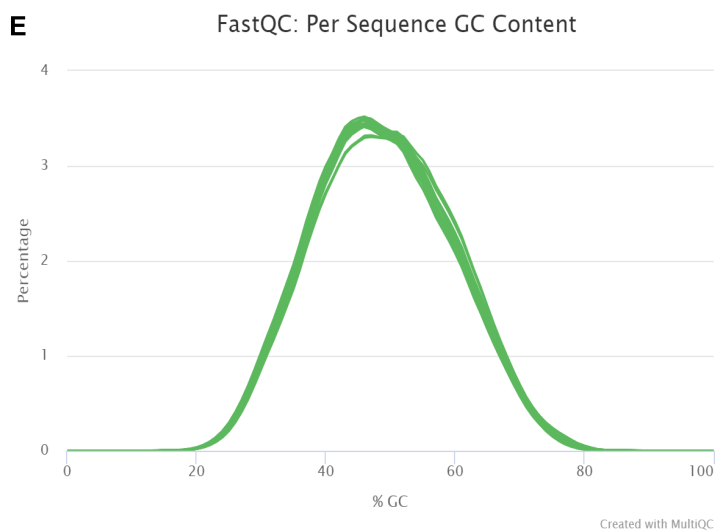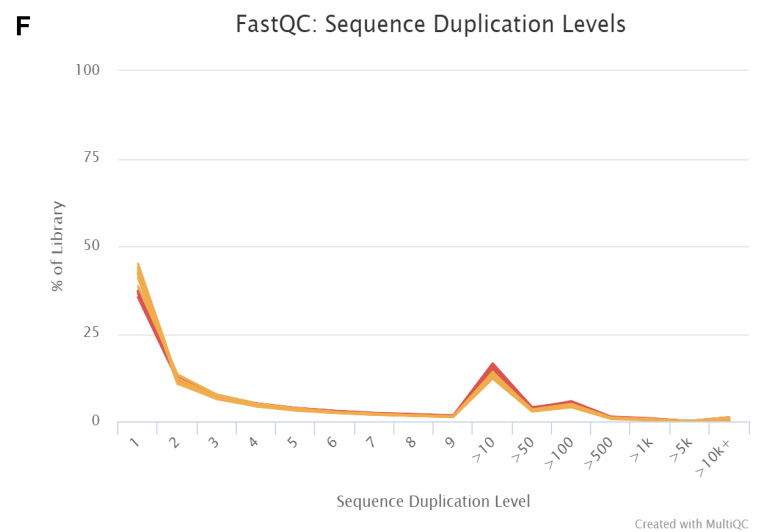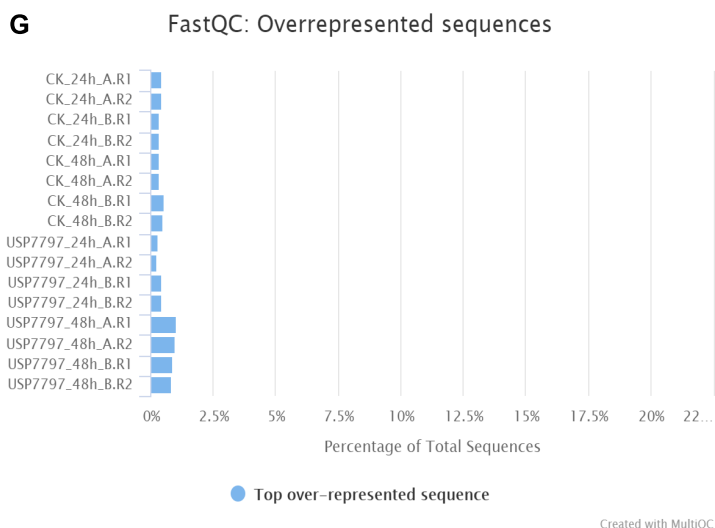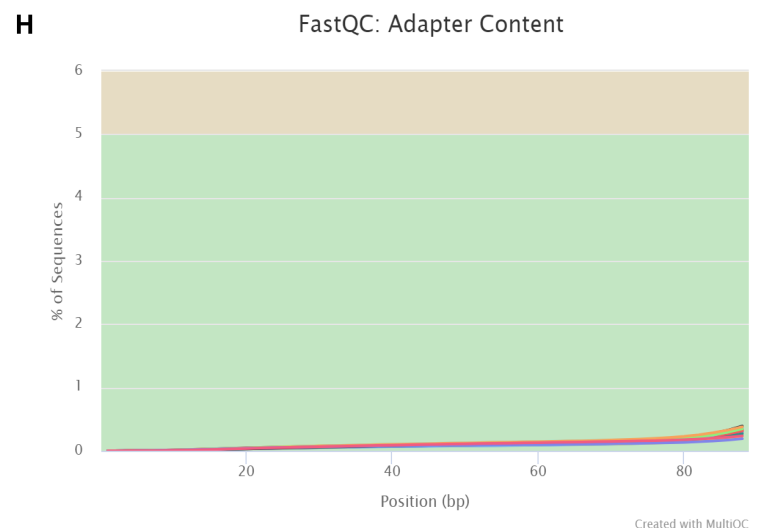

Supplement: s1 [file s1]
